# Supplementary material for: DNA-Fragments Are Transcytosed across CaCo-2 Cells by Adsorptive Endocytosis and Vesicular Mediated Transport
Source: PubMed Central journal article supplement (PMC3569430; doi:10.1371/journal.pone.0056671), 2013-02-11
Supplement: pone.0056671.s001.pdf [file pone.0056671.s001.pdf]

|     |                          |                          |                   |                      |                          |                     |
|-----|--------------------------|--------------------------|-------------------|----------------------|--------------------------|---------------------|
| 1   | GCATGCTTTA               | ATTTGTTTCT               | ATCAAATGTT        | TATTTTTTTT           | TACTAGAAAT               | AACTTATTGC          |
| 61  | ATTCATTCA                | AAATAAGATC               | ATACATACAG        | GTTAAAATAA           | ACATAGGGAA               | CCCAAAtgga          |
| 121 | aaaggaagg                | ggctcctaca               | aatgccatca        | ttg <b>cg</b> ataaaa | ggaaaggcca               | t <b>cg</b> ttgaaga |
| 181 | <u>tgcctctgcc</u>        | <u>gacagtggtc</u>        | <u>ccaaagatgg</u> | <u>acccccaccc</u>    | <u>ac<b>g</b>aggagca</u> | t <b>cg</b> tggaaaa |
| 241 | <u>agaagac<b>g</b>tt</u> | <u>ccaaccac<b>g</b>t</u> | cttcaaagca        | agtggattga           | tgtgatatct               | ccactgac <b>g</b> t |
| 301 | aagggatgac               | gcacaatccc               | actatccttc        | gcaagaccct           | tcctctatat               | aaggaagttc          |
| 361 | atctcatttg               | gagaggacac               | gctgacaagc        | tgactctagc           | agatctttca               | agaatggcac          |
| 421 | aaattaacaa               | catggcacia               | gggatacaaa        | cccttaatcc           | caattccaat               | ttccataaac          |
| 481 | ccaagtcc                 | taaactctca               | agttttcttg        | tttttggatc           | taaaaaactg               | aaaaattcag          |
| 541 | caattctat                | gttggttttg               | aaaaaagatt        | caatttttat           | gcaaaagttt               | tgttccttta          |
| 601 | ggattcagc                | atcagtggct               | acagcctgca        | tgc                  |                          |                     |
